# Supplementary material for: Control of the temperature signal in Antarctic proxies by snowfall dynamics
Source: Copernicus journal article supplement (doi:10.5194/egusphere-2023-1903), 2023-08-24
Supplement: Supplementary file [file egusphere-2023-1903-AC3-supplement.pdf]

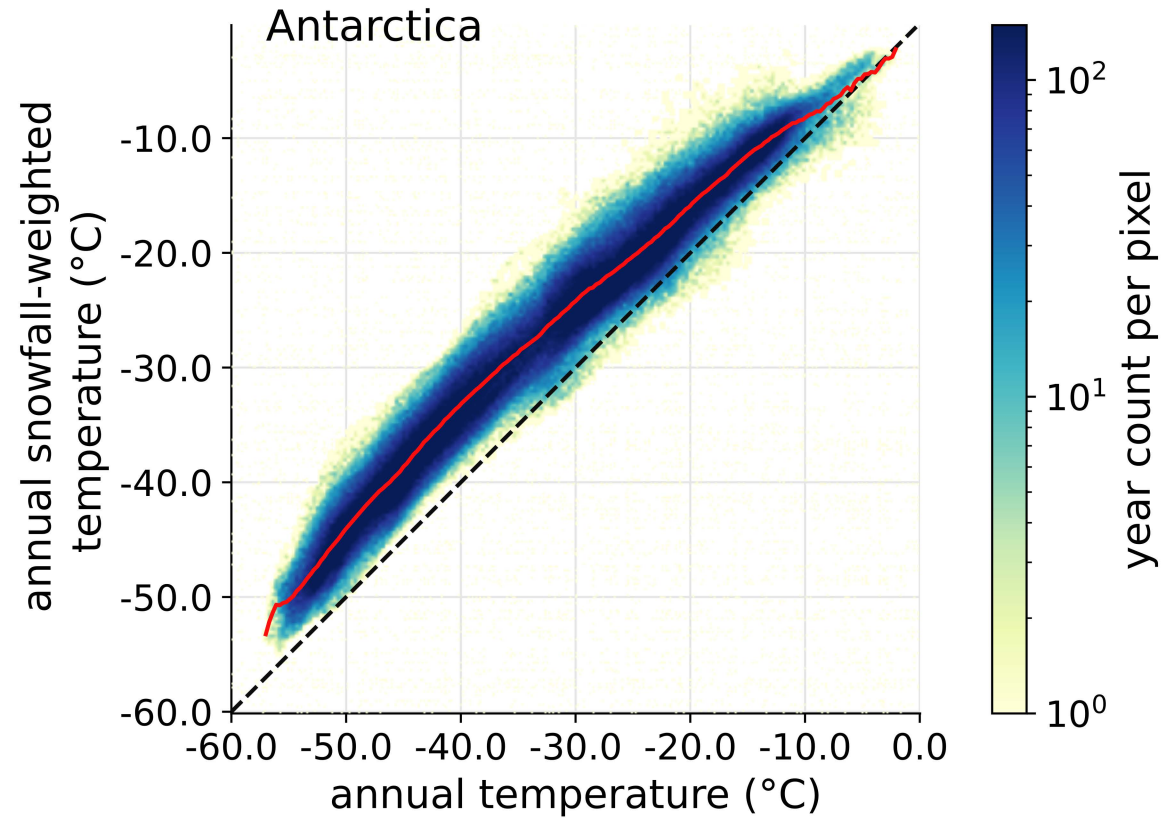

Figure 3. Scatter heatmap of annual snowfall -weighted temperature ( $T_w$ ) as a function of annual temperature ( $T$ ) for every model point on the surface of the Antarctic ice sheet (including ice shelves). The red continuous line represents the average snowfall-weighted temperature given the annual temperature, dashed line highlights 1:1 line

Dome C decomposition detail

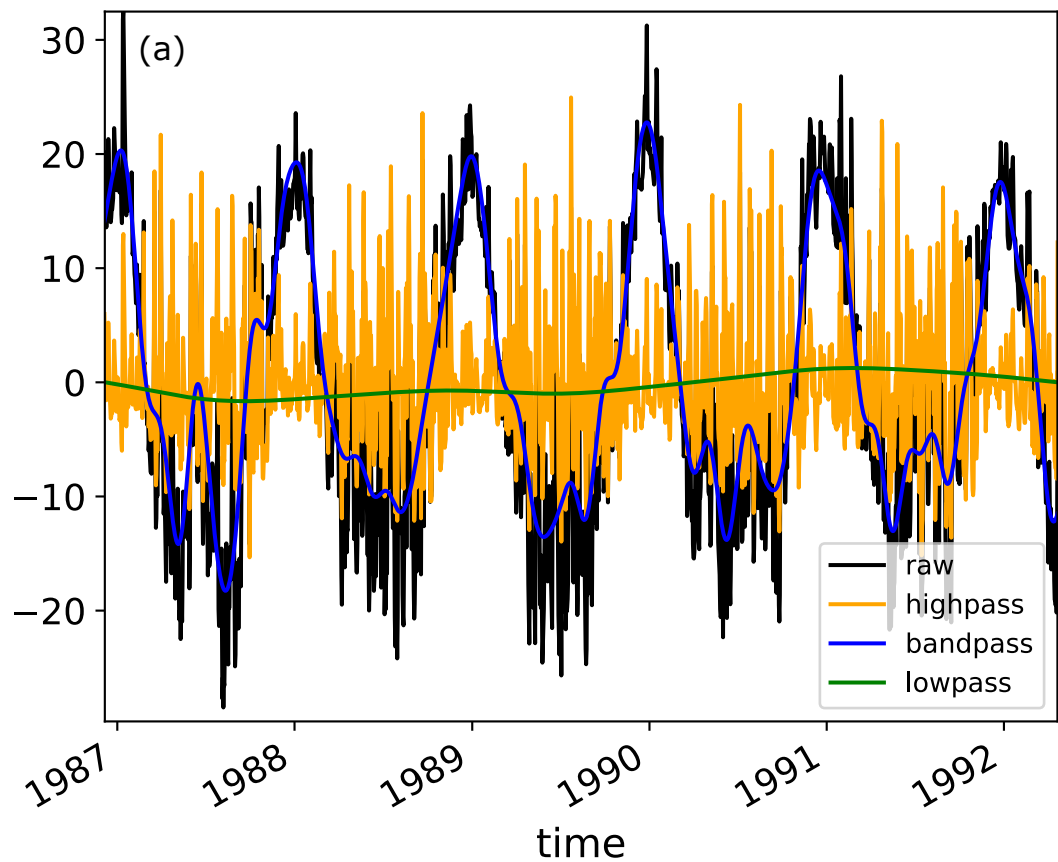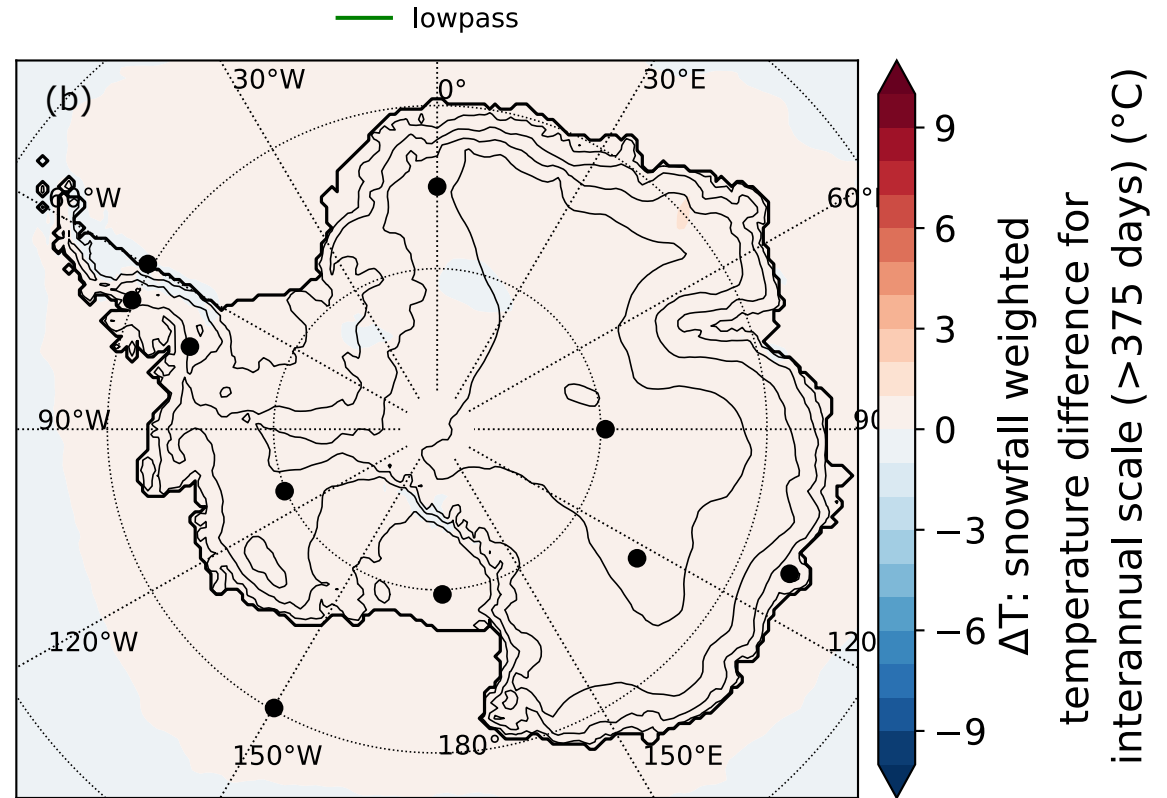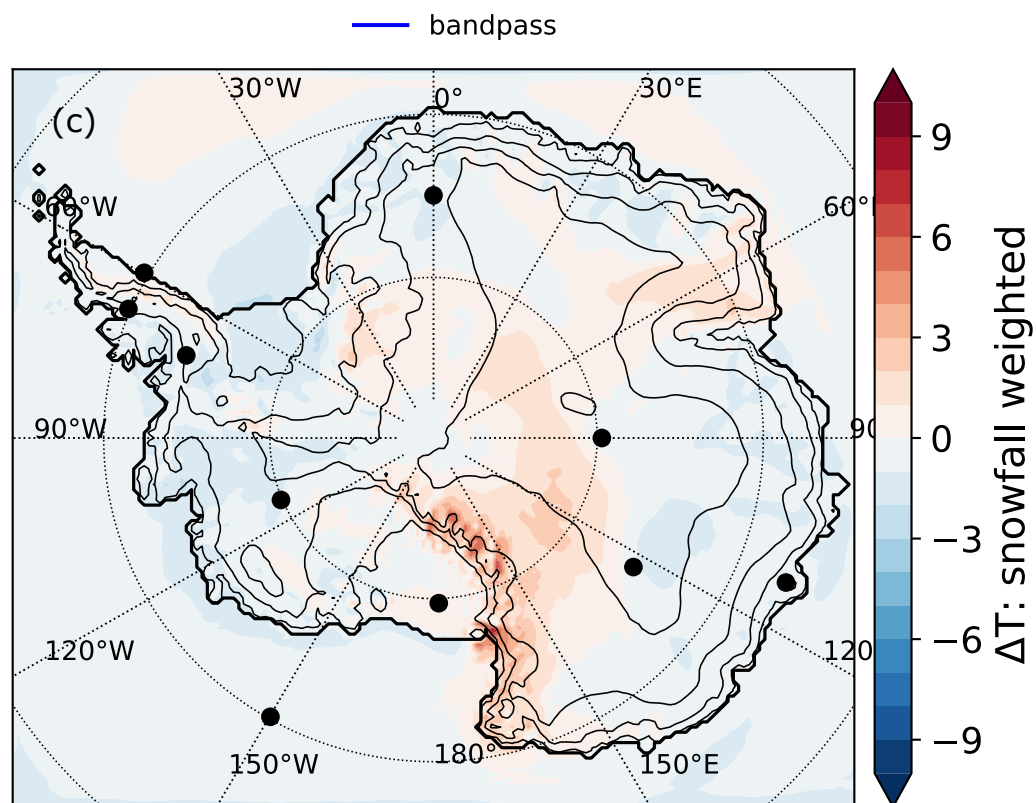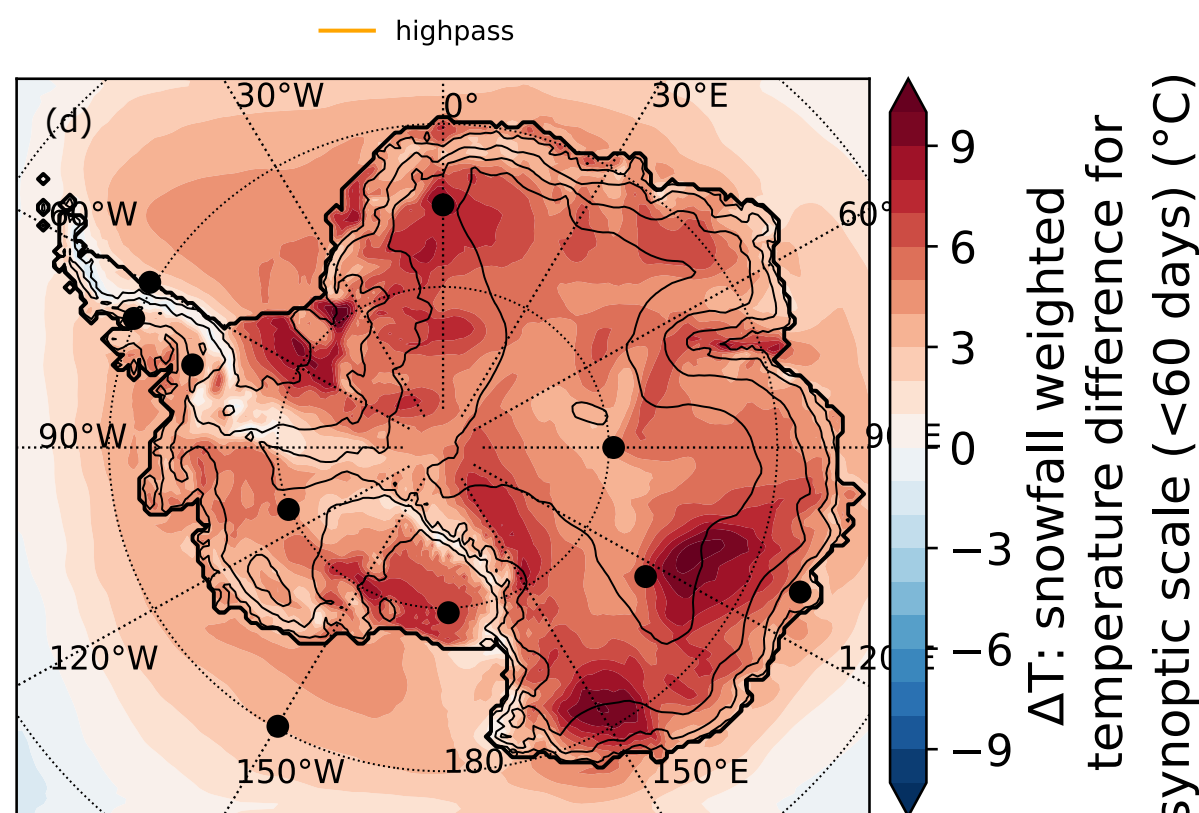

Reply to Review #3, Supporting Figure.

Decomposition of  $\Delta T$  using frequency filters: highpass (cut-off 60 days), bandpass (cut-offs 60 to 375 days) and lowpass (cut-off 375 days) to respectively represent the synoptic, seasonal and interannual effects of snowfall-weighting, as in Sime et al. (2008)

(a) example of the time-series filtered signals for Dome C.

(b) map of low-passed  $\Delta T$

(c) map of band-passed  $\Delta T$

(d) map of high-passed  $\Delta T$
